# Supplementary material
Source: publisher figshare collection journal article supplement (https://acs.figshare.com/ndownloader/files/20942469)
Supplement: Supplementary file 1 [file 20942469]

Supporting informing for

## **Ammonoxidation of Ethane to Acetonitrile and Ethylene: Reaction Transient Analysis for Co/HZSM-5 Catalyst**

Xia Liu,<sup>1,2</sup> Tingyu Liang,<sup>2</sup> Roland Barbosa,<sup>3</sup> Genwei Chen,<sup>2</sup> Hossein Toghiani,<sup>2</sup> Yizhi Xiang<sup>2,\*</sup>

<sup>1</sup> College of Materials and Chemistry & Chemical Engineering, Chengdu University of Technology, Chengdu 610059, Sichuan, China

<sup>2</sup> Dave C. Swalm School of Chemical Engineering, Mississippi State University, MS State, MS 39762, USA

<sup>3</sup> Eurofins EAG Materials Science, Sunnyvale, CA 94086, USA

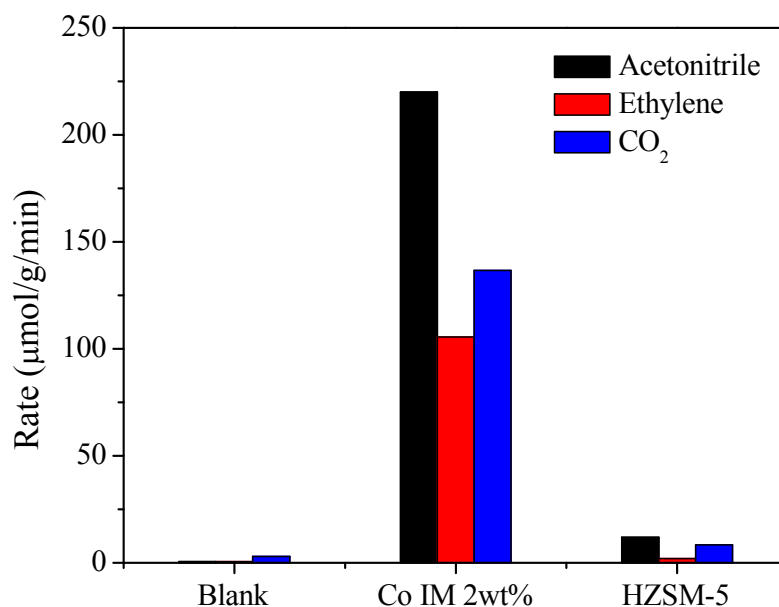

**Figure S1.** Rate for the formation of acetonitrile, ethylene and CO<sub>2</sub> during ethane ammonoxidation over Co modified HZSM-5 catalyst, pure HZSM-5 sample, and blank test. Reaction conditions: 10% C<sub>2</sub>H<sub>6</sub>, 10% NH<sub>3</sub>, and 6.4% O<sub>2</sub>, balanced with Ar, total flow rate 80 ml/min;  $T = 475\text{ }^{\circ}\text{C}$ ,  $W = 0.2\text{ g}$  or without catalyst.

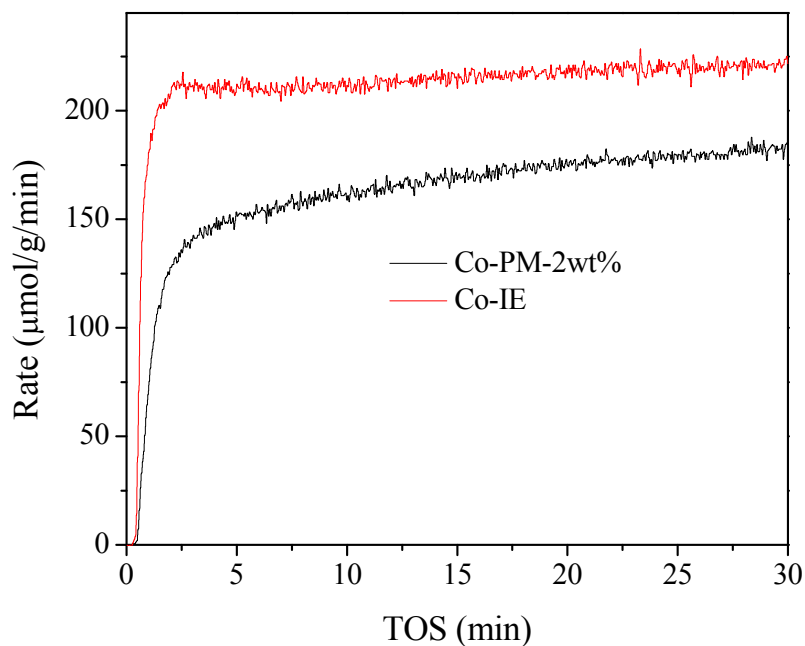

**Figure S2.** Comparison of rate of acetonitrile formation (during the initial 30 min time-on-stream) on the Co-IE and Co-PM-2wt% catalysts.

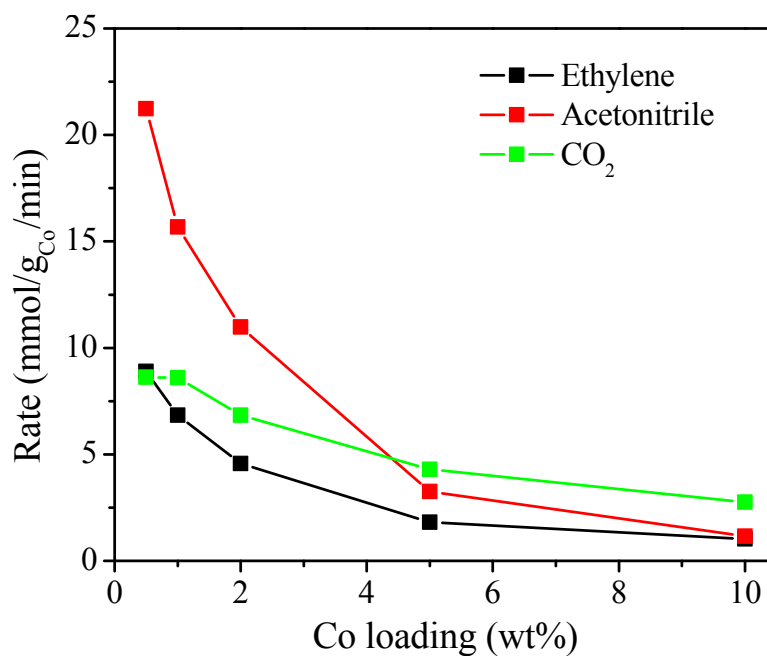

**Figure S3.** Influence of Co loading on the rate (normalized with the mass of Co) for ethylene, acetonitrile, and  $\text{CO}_2$  formation.

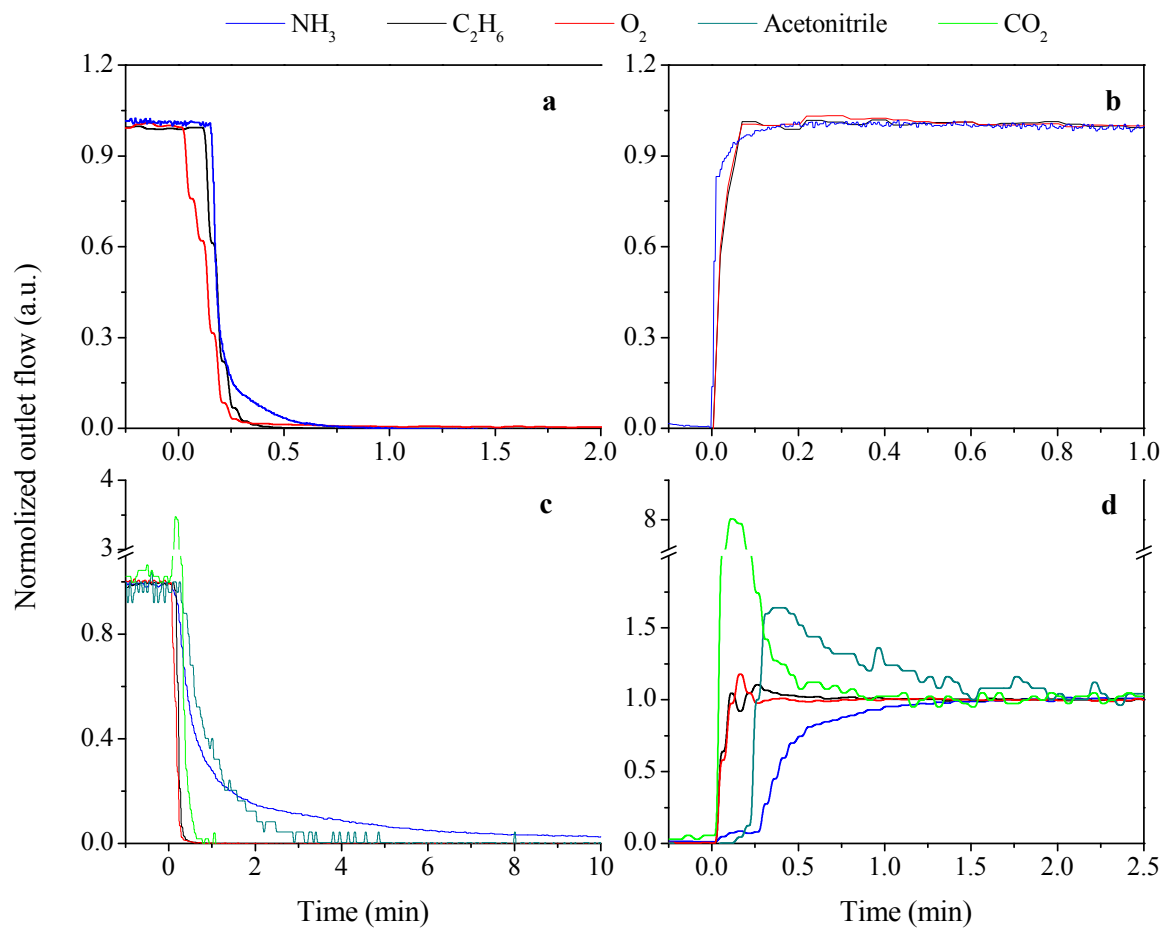

**Figure S4.** Transient response during blank test (a) and (b), and over the pure HZSM-5 sample (c) and (d). (a) and (c): back-transient decay, (b) and (d) early-stage features of delay.

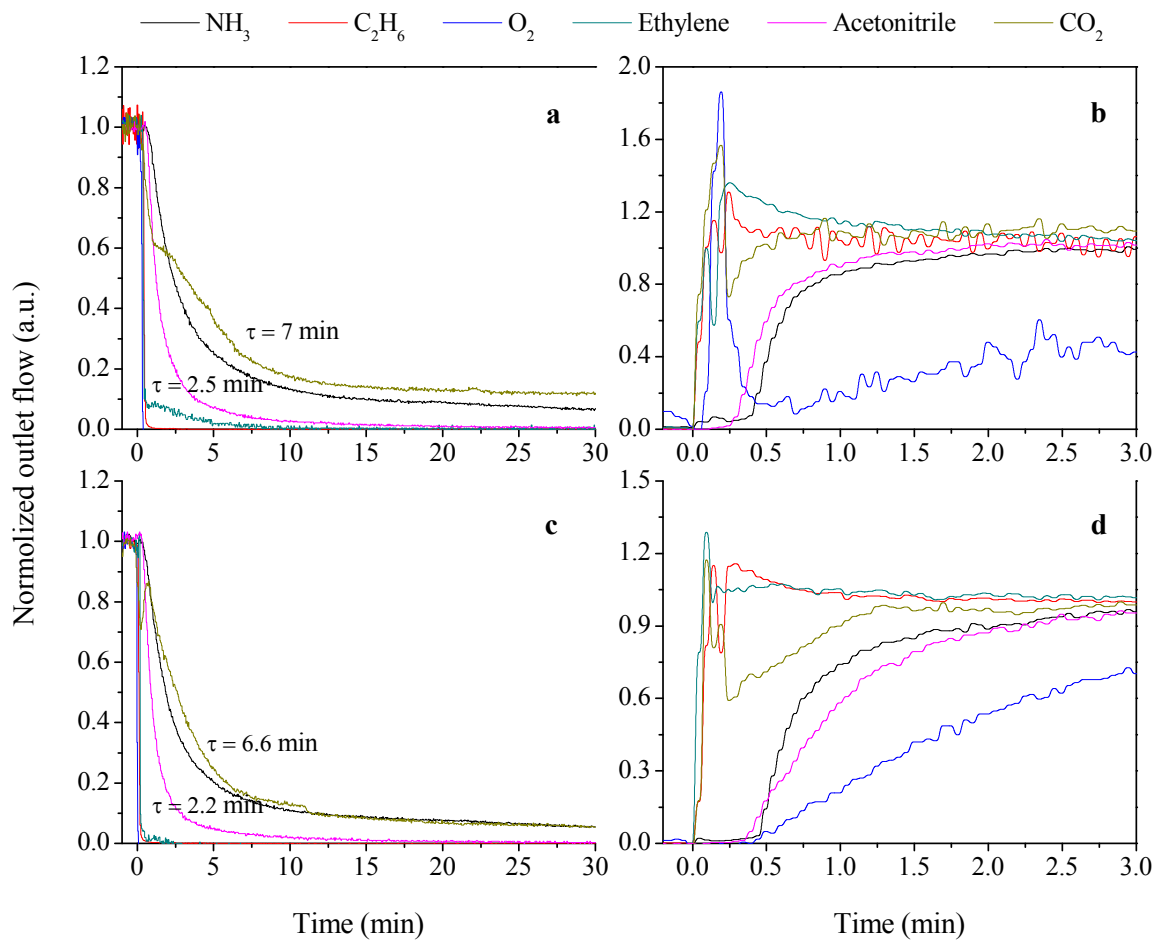

**Figure S5.** Transient response over the Co-IE (a and b) and Co-PM-2wt% (c and d) catalysts. (a) and (c): back-transient decay, (b) and (d) early-stage features of delay.
